# Supplementary material for: Drug-Eluting Balloons in the Treatment of Coronary De Novo Lesions: A Comprehensive Review
Source: Springer Nature journal article supplement (doi:10.1007/s40119-016-0064-4), 2016-07-06

## SUPPLEMENTARY MATERIAL

**Table S1. Vessel/stent thrombosis and DAPT treatment**

| Study, year                                            | Design<br>Intervention                                                                                       | Months<br>of<br>DAPT* | In-stent/in-segment thrombosis<br>(events/total number of patients) |                      | Geographical<br>mismatch<br>addressed? | Month of<br>follow-<br>up |
|--------------------------------------------------------|--------------------------------------------------------------------------------------------------------------|-----------------------|---------------------------------------------------------------------|----------------------|----------------------------------------|---------------------------|
|                                                        |                                                                                                              |                       | Early<br>(0 – 30 days)                                              | Late<br>(>30 days)   |                                        |                           |
| DEBIUT<br>Registry [59],<br>2008                       | <u>Observational</u><br>DIOR I DEB in MB and SB +<br>BMS in MB                                               | 3                     | 0/20                                                                | 0/20                 | Yes                                    | 4                         |
| LOCAL TAX<br>[21],<br>2009                             | <u>Randomised</u><br>BMS + Genie DEB<br>BMS<br>Taxus DES                                                     | 6                     | 0/67<br>0/67<br>1/67                                                | 0/67<br>0/67<br>0/67 | Yes                                    | 6                         |
| PEPCAD I [37],<br>2010                                 | <u>Observational</u><br>Sequent Please DEB<br>SeQuent Please DEB + BMS                                       | 1<br>3                | 0/82<br>1/32                                                        | 0/82<br>1/32         | No                                     | 12                        |
| PICCOLETO<br>[48],<br>2010                             | <u>Randomised</u><br>DIOR DEB<br>DIOR DEB + BMS<br>Taxus Liberté DES                                         | 1<br>3<br>12          | 0/28<br>N/A<br>0/29                                                 | 0/28<br>N/A<br>0/29  | No                                     | 9                         |
| SeQuent Please<br>World Wide<br>Registry [39],<br>2010 | <u>Observational</u><br>SeQuent Please DEB<br>SeQuent Please DEB + BMS                                       | 1                     | <i>Not reported specifically for de novo<br/>lesions</i>            |                      | Yes                                    | 9                         |
| Sgueglia <i>et al.</i><br>[61],<br>2011                | <u>Observational</u><br>BMS + “various” DEB                                                                  | 3                     | 0/14                                                                |                      | No                                     | 8                         |
| PEPCAD V [60],<br>2011                                 | <u>Observational</u><br>SeQuent Please DEB in MB<br>and SB + BMS in MB                                       | 3                     | 0/28                                                                | 2/28                 | Yes                                    | 9                         |
| PERFECT [24],<br>2011                                  | <u>Randomised</u><br>SeQuent Please DEB + EPC<br>EPC alone                                                   | 3<br>3                | 0/62<br>0/58                                                        | 0/62<br>0/58         | Yes                                    | 6                         |
| PEPCAD IV DM<br>[76],<br>2011                          | <u>Randomised</u><br>SeQuent Please DEB + BMS<br>vs.<br>Taxus Liberté DES                                    | 3<br>6                | <i>Not reported whether early or late:</i><br>0/45<br>1/39          |                      | Yes                                    | 9                         |
| De Novo Pilot<br>Study [32],<br>2011                   | <u>Randomised</u><br>Moxy DEB + BMS<br>BMS + Moxy DEB                                                        | 3                     | 0/13<br>0/13                                                        | 0/13<br>0/13         | Yes                                    | 6                         |
| BELLO [49],<br>2012                                    | <u>Randomised</u><br>IN.PACT Falcon DEB<br>IN.PACT Falcon DEB + BMS<br>Taxus Liberté DES                     | 1<br>3<br>12          | 0/90<br>0/90<br>0/92                                                | 0/90<br>0/90<br>0/92 | Yes                                    | 6                         |
| DEAR [77],<br>2012                                     | <u>Observational</u><br>DIOR II DEB + BMS<br>“various” BMS<br>“various” DES                                  | 3<br>12               | <i>Not reported whether early or late:</i><br>2/91<br>1/96<br>4/129 |                      | Yes                                    | 12                        |
| DEBIUT [62],<br>2012                                   | <u>Randomised</u><br>DEB in MB and SB + BMS in<br>MB<br>BMS in MB and POBA in SB<br>DES in MB and POBA in SB | 3<br>3<br>12          | 0/40<br>0/37<br>1/40                                                | 0/40<br>0/37<br>0/40 | Yes                                    | 12                        |
| DEB-AMI [50],<br>2012                                  | <u>Randomised</u><br>DIOR II DEB + BMS<br>BMS<br>Taxus DES                                                   | 12                    | 2/50<br>0/51<br>0/49                                                | 0/50<br>0/51<br>0/49 | Yes                                    | 6                         |
| PEPCAD CTO<br>[67],<br>2012                            | <u>Observational</u><br>SeQuent Please DEB + BMS<br>Taxus DES                                                | 6<br>12               | 0/48<br>0/48                                                        | 0/48<br>1/48         | Yes                                    | 12                        |

|                                                                   |                                                                                         |            |                      |                      |                       |     |
|-------------------------------------------------------------------|-----------------------------------------------------------------------------------------|------------|----------------------|----------------------|-----------------------|-----|
| <b>Liistro et al.</b> [31], 2013                                  | <u>Randomised</u><br>Elutax DEB + BMS vs. Xience DES                                    | 3<br>12    | 0/59<br>1/66         | 0/59<br>0/66         | Yes                   | 9   |
| <b>INDICOR</b> [33], 2013                                         | <u>Randomised</u><br>SeQuent Please DEB + BMS vs. BMS + SeQuent Please DEB              | 3<br>3     | 2/49<br>1/48         | 1/49<br>0/48         | No                    | 12  |
| <b>PEGASUS</b> [26], 2013                                         | <u>Observational</u><br>IN.PACT Falcon DEB + EPC Stent                                  | 3          | 0/40                 | 0/40                 | Yes                   | 9   |
| <b>Valentines II</b> [10], 2013                                   | <u>Observational</u><br>DIOR II DEB                                                     | 3          | 0/102                | 0/102                | No                    | 7.5 |
| <b>Calé et al.</b> [40], 2013                                     | <u>Observational</u><br>SeQuent Please                                                  | 3          | 0/74                 | 0/74                 | No                    | 12  |
| <b>Basavarajaiah et al.</b> [68], 2013                            | <u>Observational</u><br>IN.PACT Falcon DEB + "various" DES                              | 12         | 0/20                 | 0/20                 | No                    | 13  |
| <b>Costopoulos et al.</b> [69], 2013                              | <u>Observational</u><br>IN.PACT Falcon/Pantera Lux DEB ± "various" DES<br>"Various" DES | 1-12<br>12 | 0/69<br>1/93         | 0/69<br>0/93         | No                    | 26  |
| <b>SeQuent Please Small Vessel 'PCB only' Registry</b> [35], 2014 | <u>Observational</u><br>SeQuent Please DEB<br>SeQuent Please DEB + BMS                  | 1-12       | 0/420<br>0/27        | 0/420<br>0/27        | No                    | 9   |
| <b>Schulz et al.</b> [63], 2014                                   | <u>Observational</u><br>SeQuent Please DEB or In.Pact Falcon DEB                        | 1          | 0/38                 | 0/38                 | Yes                   | 4   |
| <b>BABILON</b> [64], 2014                                         | <u>Randomised</u><br>SeQuent Please DEB in MB and SB + BMS in MB<br>Xience V DES in MB  | 3<br>12    | 0/52<br>1/56         | 1/52<br>0/56         | Yes                   | 24  |
| <b>Basavarajaiah et al.</b> [70], 2014                            | <u>Observational</u><br>IN.PACT Falcon DEB +/-DES                                       | 1-12       | 0/79                 | 0/79                 | No                    | 15  |
| <b>OCTOPUS</b> [28], 2014                                         | <u>Randomised</u><br>BMS + SeQuent Please DEB<br>Xience V DES                           | 12         | <i>Not reported</i>  |                      | Yes                   | 6   |
| <b>PAPPA</b> [71], 2014                                           | <u>Observational</u><br>Pantera LUX DEB                                                 | 12         | 1/100                | 0/98                 | No                    | 12  |
| <b>DELUX Registry</b> [46], 2014                                  | <u>Observational</u><br>Pantera Lux DEB                                                 | 3          | 1/105                | 0/104                | Yes                   | 12  |
| <b>Kleber et al.</b> [52], 2015                                   | <u>Observational</u><br>SeQuent Please DEB/IN.PACT Falcon DEB                           | 1          | 0/56 (?)             | 0/56                 | <i>Not relevant**</i> | 4   |
| <b>BIOLUX-I study</b> [65], 2015                                  | <u>Observational</u><br>DES in MB + DEB in SB                                           | 6          | 0/34                 | 0/34 (1 possible)    |                       | 12  |
| <b>IN-PACT CORO</b> [23], 2015                                    | BMS<br>IN.PACT Falcon DEB + BMS<br>BMS + IN.PACT Falcon DEB                             | 3          | 0/10<br>0/10<br>0/10 | 0/10<br>0/10<br>0/10 | Yes                   | 12  |
| <b>Zurakowski et al.</b> [27], 2015                               | <u>Randomised</u><br>SeQuent Please DEB + BMS<br>Coroflex™ Please DES                   | 12<br>12   | 4/102<br>1/100       | 1/102<br>2/100       | Yes                   | 9   |
| <b>Spanish DIOR Registry</b> [47], 2015                           | <u>Observational</u><br>DIOR I/II DEB<br>DIOR I/II DEB + BMS                            | 1          | 0/97<br>0/7          | 0/97<br>1/7          | Yes                   | 12  |
| <b>Shin et al.</b> [54], 2015                                     | <u>Observational</u><br>SeQuent please DEB<br>DES                                       | 1.5<br>12  | 0/45<br>0/22         | 0/45<br>0/22         | No                    | 12  |
| <b>DEB-AMI "Fourth arm"</b> [72], 2015                            | <u>Observational</u><br>DIOR II                                                         | ?          | 0/40                 | 0/40                 | Yes                   | 6   |
| <b>Hee Hwa et al.</b>                                             | <u>Observational</u>                                                                    |            |                      |                      |                       |     |

|                                        |                                                                    |                     |                     |                     |                       |    |
|----------------------------------------|--------------------------------------------------------------------|---------------------|---------------------|---------------------|-----------------------|----|
| [73],<br>2015                          | SeQuent Please DEB                                                 | <i>Not reported</i> | 0/89                | 0/89                | <i>Not relevant**</i> | 1  |
| The Leipzig<br>Registry [42],<br>2016  | <u>Observational</u><br>SeQuent Please DEB                         | 3                   | 0/76                | <i>Not reported</i> | No                    | 1  |
| Her <i>et al.</i> [53],<br>2016        | <u>Observational</u><br>SeQuent Please DEB<br>POBA                 | 1.5                 | <i>Not reported</i> |                     | <i>Not relevant**</i> | 9  |
| Benezet <i>et al.</i><br>[41],<br>2016 | <u>Observational</u><br>SeQuent Please DEB<br>SeQuent Please + BMS | 1<br>6-12           | 0/39<br>0/14        | 0/39<br>0/14        | No                    | 36 |
| Ann <i>et al.</i> [55]<br>2016         | <u>Observational</u><br>SeQuent Please DEB                         | <i>Not reported</i> | 0/27                | 0/27                | <i>Not relevant**</i> | 12 |

\* Minimum recommendations of DAPT treatment

\*\* By design no stent implanted

See Table 1 and 3 in the main article for abbreviations.

Figure S1. Flowchart of the literature selection process

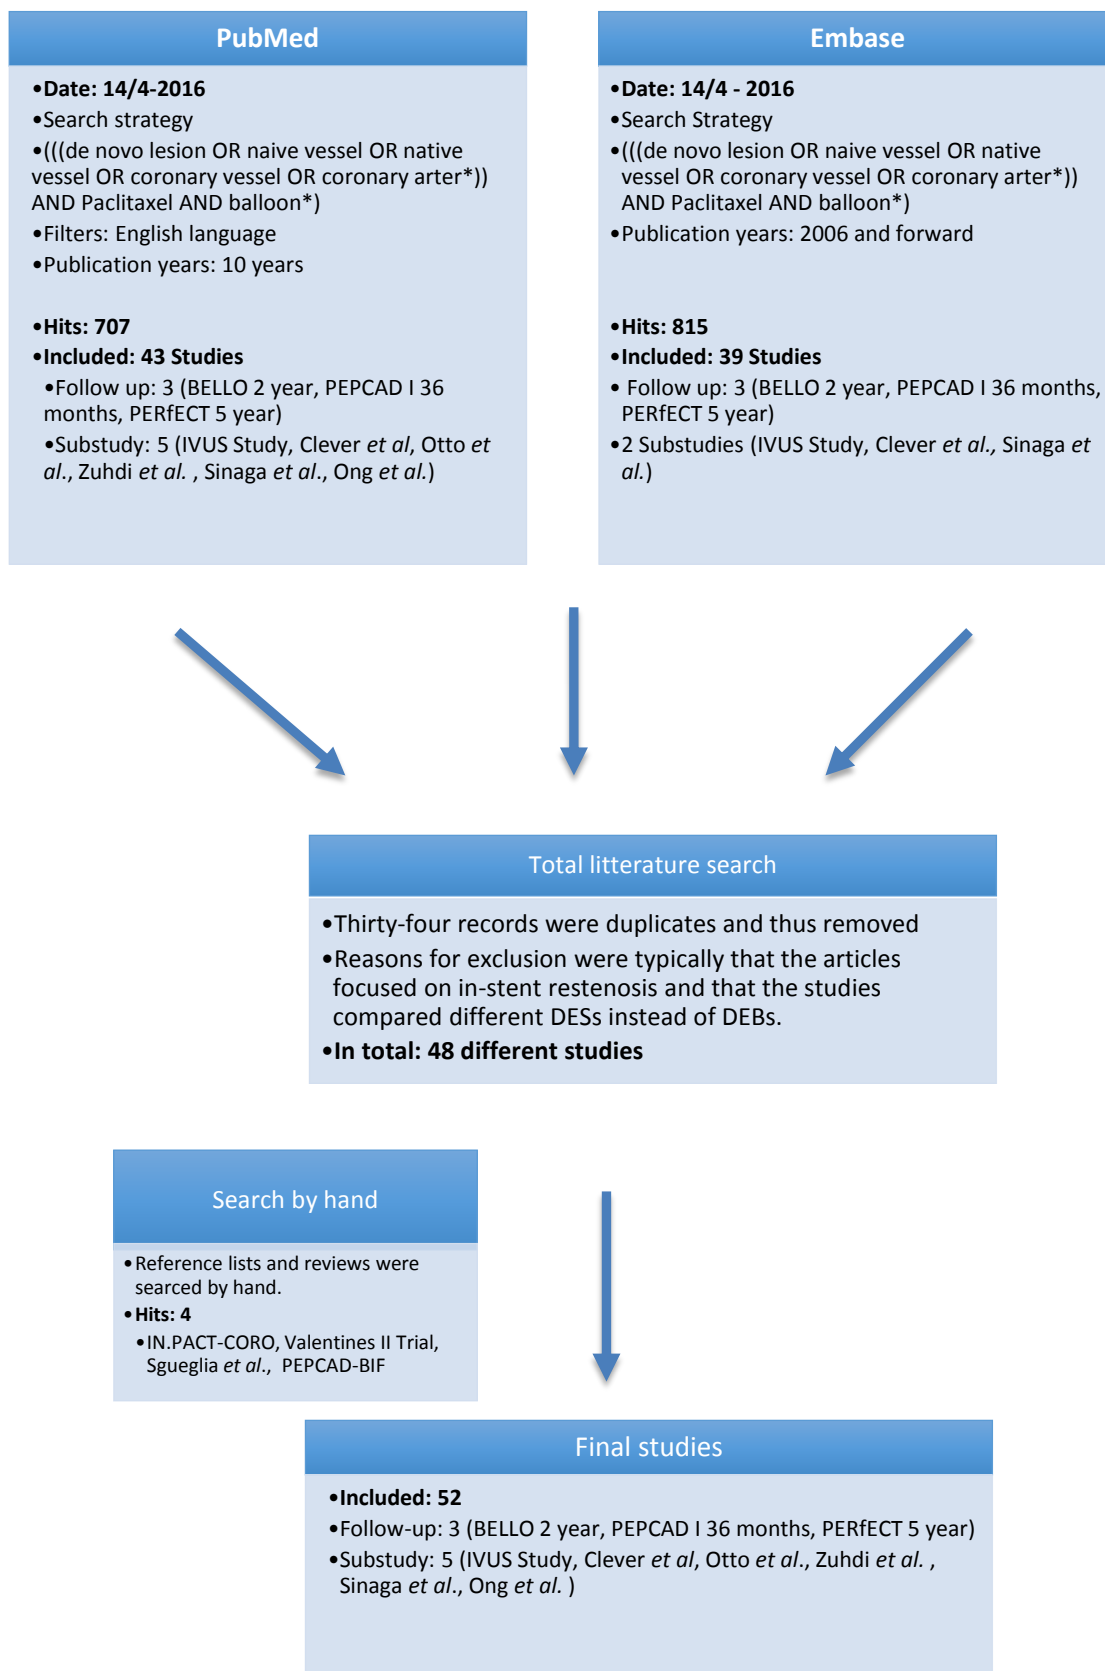

Supplement: MOESM1 [file 10345212]
